# Supplementary material for: Heterogeneous Baylis–Hillman using a polystyrene-bound 4-(N-benzyl-N-methylamino)pyridine as reusable catalyst
Source: Royal Society of Chemistry journal article supplement (doi:10.1039/b309117a), 2003-01-01
Supplement: b309117a.doc [file b309117a.doc]

*General procedure for the synthesis of PAP.* 4-[*N*-methyl-*N*-(*p*-vinylbenzyl)amino]pyridine was prepared starting from 4-(methylamino)pyridine sodium salt and *p*-(chloromethyl)styrene, and was copolymerised with styrene (1 eq.) and divinylbenzene (0.02 eq.) to give the polymer-bound 4-(*N*-benzyl-*N*-methylamino)pyridine (PAP). A more detailed experimental procedure can be found in: *Polymer-supported bases. 1. Synthesis and catalytic activity of polymer-bound 4-(N-benzyl-N-methylamino)pyridine.* Tomoi, M.; Akada, Y.; Kakiuchi, H. Makromolekulare Chemie, Rapid Commun. (1982), 3(8), 537-542.
